1 Title: Unique metabolic strategies in Hadean analogues reveal hints for primordial

2 physiology

3 Authors:

4 Masaru Konishi Nobu<sup>1†\*</sup>, Ryosuke Nakai<sup>1,2†</sup>, Satoshi Tamazawa<sup>1,3</sup>, Hiroshi Mori<sup>4</sup>, Atsushi

5 Toyoda<sup>4</sup>, Akira Ijiri<sup>5</sup>, Shino Suzuki<sup>6,7</sup>, Ken Kurokawa<sup>4</sup>, Yoichi Kamagata<sup>1</sup>, and Hideyuki

6 Tamaki<sup>1\*</sup>

7

8 Affiliation:

9 <sup>1</sup> Bioproduction Research Institute, National Institute of Advanced Industrial Science and

10 Technology (AIST), 1-1-1 Higashi, Tsukuba, Ibaraki 305-8566, Japan

11 <sup>2</sup> Bioproduction Research Institute, National Institute of Advanced Industrial Science and

12 Technology (AIST), 2-17-2-1, Tsukisamu-Higashi, Sapporo, 062-8517, Japan

13 <sup>3</sup> Horonobe Research Institute for the Subsurface Environment (H-RISE), Northern

14 Advancement Center for Science & Technology, 5-3 Sakaemachi, Horonobe, Teshio,

15 Hokkaido, 098-3221, Japan

16 <sup>4</sup> National Institute of Genetics, 1111 Yata, Mishima, Shizuoka 411-8540, Japan

17 <sup>5</sup> Kochi Institute for Core Sample Research, Japan Agency for Marine-Earth Science and

18 Technology (JAMSTEC), 200 Monobe Otsu, Nankoku, Kochi, Japan

19 <sup>6</sup> Institute for Extra-cutting-edge Science and Technology Avant-garde Research (X-star),

20 JAMSTEC, Natsushima 2-15, Yokosuka, Kanagawa 237-0061, Japan

21 <sup>7</sup> Institute of Space and Astronautical Science (ISAS), Japan Aerospace Exploration Agency

22 (JAXA), 3-1-1 Yoshinodai, Chuo-ku, Sagami-hara, Kanagawa 252-5210, Japan

23

24 † These authors contributed equally.

25 \* Corresponding authors: [m.nobu@aist.go.jp](mailto:m.nobu@aist.go.jp) and [tamaki-hideyuki@aist.go.jp](mailto:tamaki-hideyuki@aist.go.jp)

26 **Abstract**

27 Primordial microorganisms are postulated to have emerged in H<sub>2</sub>-rich alkaline Hadean  
28 serpentinite-hosted environments with homoacetogenesis as a core metabolism. However,  
29 investigation of two modern serpentinization-active analogues of early Earth reveals that  
30 conventional H<sub>2</sub>-/CO<sub>2</sub>-dependent homoacetogenesis is thermodynamically unfavorable *in situ*  
31 due to picomolar CO<sub>2</sub> levels. Through metagenomics and thermodynamics, we discover unique  
32 taxa capable of metabolism adapted to the habitat. This included a novel deep-branching  
33 phylum, “*Ca. Lithoacetigenota*”, that exclusively inhabits Hadean analogues and harbors genes  
34 encoding alternative modes of H<sub>2</sub>-utilizing lithotrophy. Rather than CO<sub>2</sub>, these metabolisms  
35 utilize reduced carbon compounds detected *in situ* presumably serpentinization-derived:  
36 formate and glycine. The former employs a partial homoacetogenesis pathway and the latter a  
37 distinct pathway mediated by a rare selenoprotein – the glycine reductase. A survey of  
38 serpentinite-hosted system microbiomes shows that glycine reductases are diverse and nearly  
39 ubiquitous in Hadean analogues. “*Ca. Lithoacetigenota*” glycine reductases represent a basal  
40 lineage, suggesting that catabolic glycine reduction is an ancient bacterial innovation for  
41 gaining energy from geogenic H<sub>2</sub> even under serpentinization-associated hyperalkaline, CO<sub>2</sub>-  
42 poor conditions. This draws remarkable parallels with ancestral archaeal H<sub>2</sub>-driven methyl-  
43 reducing methanogenesis recently proposed. Unique non-CO<sub>2</sub>-reducing metabolic strategies  
44 presented here may provide a new view into metabolisms that supported primordial life and  
45 the diversification of LUCA towards *Archaea* and *Bacteria*.

46 During the Hadean eon (~4.6-4.0 Ga), H<sub>2</sub>-rich hyperalkaline fluids generated from widespread  
47 serpentinization of ultramafic rocks are thought to have been conducive for the evolution of  
48 primordial life<sup>1-7</sup>. Early microbial life is theorized to have catabolized H<sub>2</sub> through  
49 homoacetogenesis<sup>4,8,9</sup>, and recent studies point towards evolutionary antiquity of the central  
50 enzyme of the pathway, the bifunctional CO dehydrogenase/acetyl-CoA synthase or  
51 CODH/ACS<sup>10-12</sup>. Our recent study also shows that an acetyl-CoA pathway-like chain of  
52 reactions can proceed in the presence of hydrothermal iron minerals<sup>13</sup>, suggesting the pathway  
53 preceded life and life simply encapsulated this into cells<sup>14</sup>. Protocells and the last universal  
54 common ancestor (LUCA) are hypothesized to have evolved within alkaline hydrothermal  
55 mineral deposits at the interface of serpentinization-derived fluid and ambient water (*e.g.*,  
56 Hadean weakly acidic seawater)<sup>15-17</sup>. Although such interfaces no longer exist (*i.e.*, the Hadean  
57 Earth lacked O<sub>2</sub> but most water bodies contain O<sub>2</sub> on modern Earth), some anaerobic terrestrial  
58 and oceanic ecosystems harboring active serpentinization (*e.g.*, Lost City hydrothermal field)  
59<sup>18-25</sup> have been identified as modern analogues of ancient serpentinization-associated alkaline  
60 fluids. These are ideal ecosystems for investigating what kind of H<sub>2</sub> catabolism may have  
61 supported early post-LUCA life venture away from the interface deeper into the hyperalkaline  
62 hydrothermal systems. Gaining independence from the gradient at the interface was likely a  
63 critical step in the evolution of life, and life likely headed towards the hyperalkaline fluids due  
64 to their reliance on serpentinization-derived energy sources and their cellular machinery being  
65 alkaliphilic (*i.e.*, moving towards the weakly acidic seawater would have been an unfavorable  
66 transition)<sup>5,15-17</sup>. However, microbiologists have yet to provide insight into such metabolic  
67 strategies from extant organisms inhabiting modern analogues. In this study, we pair  
68 metagenomics and thermodynamics to characterize uncultured putative anaerobic H<sub>2</sub> utilizers  
69 inhabiting alkaline H<sub>2</sub>-rich serpentinite-hosted systems (Hakuba Happo hot springs in Hakuba,

70 Japan and The Cedars springs in California, USA;  $pH \sim 10.9$  and  $\sim 11.9$ , respectively)<sup>26-28</sup> and  
71 elucidate lithotrophic catabolism that may have been relevant to early life.

72

### 73 **Thermogeochemistry**

74 To evaluate whether homoacetogenesis is viable *in situ*, we examined the *in situ* geochemical  
75 environment and the thermodynamics of  $H_2$ /formate utilization and homoacetogenesis. The  
76 spring waters of both Hakuba and The Cedars contained  $H_2$  (*e.g.*, 201–664  $\mu M$  in Hakuba<sup>28</sup>).  
77 Formate, another compound thought to be abiotically generated through serpentinization, was  
78 also detected in Hakuba (8  $\mu M$  in drilling well #3<sup>29</sup>) and The Cedars (6.9  $\mu M$  in GPS1). Acetate  
79 has also been detected *in situ* (4  $\mu M$  in Hakuba<sup>29</sup> and 69.3  $\mu M$  in The Cedars GPS1), suggesting  
80 these ecosystems may host novel  $H_2$ - and/or formate-utilizing homoacetogens.  
81 Thermodynamic calculations confirm that  $H_2$  and formate are reductants *in situ* (*i.e.*,  $H_2 = 2H^+$   
82  $+ 2e^-$  /  $Formate^- = H^+ + CO_2 + 2e^-$ ): the Gibbs free energy yields ( $\Delta G$ ) for oxidation (coupled  
83 with physiological electron carriers  $NADP^+$ ,  $NAD^+$ , and ferredoxin) are less than  $-4.78$  kJ per  
84 mol  $H_2$  and  $-24.92$  kJ per mol formate in Hakuba, and  $-10.73$  and  $-22.03$  in The Cedars  
85 respectively (see Supplementary Results). However, serpentinite-hosted systems impose a  
86 unique challenge to homoacetogenesis – a key substrate,  $CO_2$ , is at extremely low  
87 concentrations due to the high alkalinity. We estimate that the aqueous  $CO_2$  concentration is  
88 below 0.0004 nM in Hakuba ( $pH$  10.7 and  $<0.1$   $\mu M$  TIC) and 0.003 nM in The Cedars ( $pH$   
89 11.9 and 35  $\mu M$  TIC)<sup>26,28</sup>. In Hakuba,  $H_2/CO_2$ -driven acetogenesis ( $\Delta G$  of  $-1.68$  kJ per mol  
90 acetate) cannot support microbial energy generation ( $\Delta G \leq -20$  kJ per mol is necessary<sup>30</sup>; Fig.  
91 S1). Moreover, in both Hakuba and The Cedars, one of the first steps in  $CO_2$ -reducing  
92 homoacetogenesis, reduction of  $CO_2$  to formate, is unfavorable based on the thermodynamics  
93 presented above ( $\Delta G > +24.92$  or  $+22.02$  kJ per mol formate). Thus, catabolic reduction of  $CO_2$   
94 to acetate is thermodynamically challenging *in situ* and may only run if investing ATP (*e.g.*,

95 Calvin-Benson-Bassham cycle [-6 ATP;  $\Delta G$  of -361.68 kJ per mol acetate in Hakuba] or  
96 reductive tricarboxylic acid [-1 ATP; -61.68 kJ per mol]). Under CO<sub>2</sub> limitation, autotrophs  
97 are known to accelerate CO<sub>2</sub> uptake through HCO<sub>3</sub><sup>-</sup> dehydration to CO<sub>2</sub> (carbonic anhydrase)  
98 or carbonate mineral dissolution, but both only modify kinetics and are not effective in  
99 changing the maximum CO<sub>2</sub> concentration (determined by equilibrium with carbonate species).  
100 In addition, in Hakuba, the CO<sub>3</sub><sup>2-</sup> concentration is too low (87.5 nM CO<sub>3</sub><sup>2-</sup>) for carbonate  
101 mineral precipitation (*e.g.*, [CO<sub>3</sub><sup>2-</sup>] must exceed 38.5  $\mu$ M given K<sub>s</sub> of 5x10<sup>-9</sup> for CaCO<sub>3</sub> and  
102 [Ca<sup>2+</sup>] of 0.13 mM).

103

104 Based on thermodynamic calculations, the energy obtainable from H<sub>2</sub>/CO<sub>2</sub>-driven  
105 homoacetogenesis is too small to support life in many Hadean analogues (Fig. S2a), yet acetate  
106 is detected in some of these ecosystems (Fig. S2b). Thus, CO<sub>2</sub>-independent electron-disposing  
107 metabolism may have been necessary for early life to gain energy from H<sub>2</sub> in the hyperalkaline  
108 fluids of hydrothermal systems. Here, we explore the metabolic capacities of extant organisms  
109 living in CO<sub>2</sub>-limited Hadean analogues to gain insight into potential metabolic strategies that  
110 LUCA or early post-LUCA organisms beginning diversification towards *Bacteria* and *Archaea*  
111 may have utilized to thrive in alkaline serpentinite-active ecosystems.

112

### 113 **Diverse putative H<sub>2</sub>- and formate-utilizing organisms**

114 Through metagenomic exploration of the two serpentinite-hosted systems (Table S1), we  
115 discover a plethora of phylogenetically novel organisms encoding genes for H<sub>2</sub> and formate  
116 metabolism (19 bins with 73.2-94.8% completeness and 0.0-8.1% contamination [86.1% and  
117 3.8% on average respectively]; available under NCBI BioProject PRJNA453100) despite  
118 challenges in acquisition of genomic DNA (15.7 and 18.9 ng of DNA from 233 and 720 L of  
119 filtered Hakuba Happo spring water, respectively; RNA was below the detection limit). We

120 find metagenome-assembled genomes (MAGs) affiliated with lineages of *Firmicutes* (*e.g.*,  
121 *Syntrophomonadaceae* and uncultured family SRB2), *Actinobacteria*, and candidate division  
122 NPL-UPA2<sup>31</sup> (Fig. S3). We also recovered MAGs for a novel candidate phylum, herein  
123 referred to as “*Ca. Lithoacetigenota*”, that inhabits both Hakuba and The Cedars and, to our  
124 knowledge, no other ecosystems (Fig. 1a and S3). These genomes encode enzymes for  
125 oxidizing H<sub>2</sub> and formate (*i.e.*, hydrogenases and formate dehydrogenases<sup>32-39</sup>; see  
126 Supplementary Results), suggesting that organisms *in situ* can employ H<sub>2</sub> and formate as  
127 electron donors.

128

### 129 “*Ca. Lithoacetigenota*” has unique site-adapted metabolism

130 Inspection of the serpentinite-hosted environment-exclusive phylum “*Ca. Lithoacetigenota*”  
131 reveals specialization to H<sub>2</sub>-driven lithotrophy potentially suitable for the low-CO<sub>2</sub> *in situ*  
132 conditions (Fig. 1b). We discover that The Cedars-inhabiting population (*e.g.*, MAG BS5B28,  
133 94.8% completeness and 2.9% contamination) harbors genes for H<sub>2</sub> oxidation ([NiFe]  
134 hydrogenase Hox) and a nearly complete Wood-Ljungdahl pathway and an oxidoreductase  
135 often associated with acetogenesis – NADH:ferredoxin oxidoreductase Rnf<sup>40,41</sup> (Table S2 and  
136 S3). One critical enzyme, the formate dehydrogenase, is missing from all three “*Ca.*  
137 *Lithoacetigenota*” MAGs from The Cedars (and unbinned contigs), indicating that these  
138 bacteria can neither perform H<sub>2</sub>/CO<sub>2</sub>-driven nor formate-oxidizing acetogenesis (Fig. 1b).  
139 However, even without the formate dehydrogenase, the genes present can form a coherent  
140 pathway that uses formate rather than CO<sub>2</sub> as a starting point for the “methyl branch” of the  
141 Wood-Ljungdahl pathway (*i.e.*, formate serves as an electron acceptor; Fig. 1b). This is a  
142 simple yet potentially effective strategy for performing homoacetogenesis while circumventing  
143 the unfavorable reduction of CO<sub>2</sub> to formate. Coupling H<sub>2</sub> oxidation with this formate-reducing  
144 pathway is thermodynamically viable as it halves the usage of CO<sub>2</sub> ( $3\text{H}_2 + \text{Formate}^- + \text{CO}_2 =$

145 Acetate<sup>-</sup> + 2H<sub>2</sub>O; ΔG of -29.62 kJ per mol acetate) and, as a pathway, is simply an intersection  
146 between the conventional H<sub>2</sub>/CO<sub>2</sub>-driven and formate-disproportionating acetogenesis (Fig.  
147 1b). Although use of formate as an electron acceptor for formate-oxidizing acetogenesis is  
148 quite common, no previous homoacetogens have been observed to couple H<sub>2</sub> oxidation with  
149 acetogenesis from formate, likely because CO<sub>2</sub> has a much higher availability than formate in  
150 most ecosystems.

151

152 Interestingly, the Hakuba-inhabiting “*Ca. Lithoacetigenota*” (HKB210 and HKB111) also  
153 encodes Hox for H<sub>2</sub> oxidation but lacks genes for homoacetogenesis (no homologs closely  
154 related to The Cedars population genes were detected even in unbinned metagenomic contigs).  
155 Perhaps this population forgoes the above H<sub>2</sub>/formate-driven homoacetogenesis because the  
156 estimated energy yield of the net reaction *in situ* (ΔG of -19.94 kJ per mol acetate) is extremely  
157 close to the thermodynamic threshold of microbial catabolism (slightly above -20 kJ per mol)  
158 and, depending on the actual threshold for “*Ca. Lithoacetigenota*” and/or even slight changes  
159 in the surrounding conditions (*e.g.*, ΔG increases by 1 kJ per mol if H<sub>2</sub> decreases by 20 μM  
160 decreases in Hakuba), the metabolism may be unable to recover energy. Through searching the  
161 physicochemical environment for alternative exogenous electron acceptors and MAGs for  
162 electron-disposing pathways, we detected a low concentration of glycine *in situ* (5.4 ± 1.6 nM;  
163 Table S4) and found genes specific to catabolic glycine reduction (see next paragraph). We  
164 suspect that some portion of this glycine is likely geochemically generated *in situ*, given that  
165 (a) glycine is often detected as the most abundant amino acid produced by both natural and  
166 laboratory-based serpentinization (*e.g.*, H<sub>2</sub> + Formate = Formaldehyde ⇒ Formaldehyde +  
167 NH<sub>3</sub> = Glycine)<sup>1,7,42-47</sup> and (b) no other amino acid was consistently detectable (if glycine was  
168 cell-derived, other amino acids ought to also be consistently detected).

169

170 For utilization of the putatively abiotic glycine, the Hakuba “*Ca. Lithoacetigenota*” encode  
171 glycine reductases (Grd; Fig. 2 and S4; Tables S2 and S3) – a unidirectional selenoprotein for  
172 catabolic glycine reduction<sup>48,49</sup>. Based on the genes available, this population likely specializes  
173 in coupling H<sub>2</sub> oxidation and glycine reduction (Fig. 1b). Firstly, the genomes encode NADP-  
174 linked thioredoxin reductases (NADPH + Thioredoxin<sub>ox</sub> → NADP<sup>+</sup> + Thioredoxin<sub>red</sub>) that can  
175 bridge electron transfer from H<sub>2</sub> oxidation (H<sub>2</sub> + NADP → NADPH + H<sup>+</sup>) to glycine reduction  
176 (Glycine<sup>-</sup> + Thioredoxin<sub>red</sub> → Acetyl-P<sub>i</sub> + NH<sub>3</sub> + Thioredoxin<sub>ox</sub>). Secondly, though glycine  
177 reduction is typically coupled with amino acid oxidation (*i.e.*, Stickland reaction in *Firmicutes*  
178 and *Synergistetes*<sup>48,50</sup>), similar metabolic couplings have been reported for some organisms  
179 (*i.e.*, formate-oxidizing glycine reduction [via Grd]<sup>51</sup> and H<sub>2</sub>-oxidizing trimethylglycine  
180 reduction [via Grd-related betaine reductase]<sup>52</sup>). Thirdly, Grd is a rare catabolic enzyme, so  
181 far found in organisms that specialize in amino acid (or peptide) catabolism, many of which  
182 are reported to use glycine for the Stickland reaction (*e.g.*, *Peptoclostridium* of *Firmicutes* and  
183 *Aminobacterium* of *Synergistetes*<sup>53</sup>). Lastly, the population lacks any discernable fermentative  
184 and respiratory electron disposal pathways and oxidative organotrophy (Table S2 and S3).  
185 Moreover, reflecting the lack of other catabolic pathways, the Hakuba “*Ca. Lithoacetigenota*”  
186 MAGs display extensive genome streamlining, comparable to that of *Aurantimicrobium*<sup>54,55</sup>,  
187 “*Ca. Pelagibacter*”<sup>56</sup>, and *Rhodoluna*<sup>57</sup> (Fig. S6). Thermodynamic calculations show that H<sub>2</sub>-  
188 oxidizing glycine reduction is thermodynamically favorable *in situ* (ΔG° of -70.37 kJ per mol  
189 glycine [ΔG of -85.84 in Hakuba]; Fig. S1). Further, based on the pathway identified, this  
190 metabolism is >10 times more efficient in recovering energy from H<sub>2</sub> (1 mol ATP per mol H<sub>2</sub>)  
191 than acetogenesis utilizing H<sub>2</sub>/CO<sub>2</sub> (0.075 mol ATP per mol H<sub>2</sub> based on the pathway  
192 *Acetobacterium woodii* utilizes) or H<sub>2</sub>/formate (0.075 mol ATP per mol H<sub>2</sub>, assuming no  
193 energy recovery associated with the formate dehydrogenase). We also detect glycine reductases  
194 in The Cedars “*Ca. Lithoacetigenota*”, indicating that it may also perform this metabolism (ΔG



195 of  $-76.87$  in The Cedars, assuming  $201 \mu\text{M H}_2$ ). Thus, we propose glycine as an overlooked  
196 thermodynamically and energetically favorable electron acceptor for  $\text{H}_2$  oxidation in  
197 serpentinite-hosted systems.

198

199 Given the phylogenetic and metabolic uniqueness of these populations, we report  
200 provisional taxonomic assignment to “*Ca. Lithoacetigenota*” phylum. nov., “*Ca.*  
201 *Thermoacetigena glycinireducens*” gen. nov., sp. nov. (HKB111 and HKB210), and “*Ca.*  
202 *Psychroacetigena formicireducens*” gen. nov., sp. nov. (BS525, BS5B28, and GPS1B18) (see  
203 Supplementary Results). Based on a concatenated ribosomal protein tree, this serpentinite-  
204 hosted ecosystem-associated candidate phylum is closely related to a deep-branching group of  
205 bacterial phyla (Fig. 1a) (e.g., *Caldiserica* [Caldisericota in GTDB phylogeny],  
206 *Coprothermobacterota*, and *Dictyoglomi* [Dictyoglomota]<sup>58</sup>), many of which have extremely  
207 limited phylogenetic diversity (only 8, 1, and 2 genus-level lineages identified respectively via  
208 cultivation and metagenomics [based on GTDB release 95]) and ecological distribution on  
209 modern Earth. Comparative genomics shows that “*Ca. Lithoacetigenota*” shares 623 core  
210 functions (based on Bacteria-level COGs/NOGs predicted by eggno-mapper shared by the  
211 two highest quality Hakuba and The Cedars MAGs HKB210 and BS5B28; Fig. 1c). When  
212 compared with the core functions of two closest related phyla (*Caldiserica* and  
213 *Coprothermobacterota*), 176 functions were unique to “*Ca. Lithoacetigenota*”, including those  
214 for NiFe hydrogenases (and their maturation proteins), selenocysteine utilization (essential for  
215 Grd), and sodium:proton antiporter for alkaliphily. With *Coprothermobacterota*, 232 functions  
216 were shared, including Grd, thioredoxin oxidoreductase (essential for electron transfer to Grd),  
217 and additional proteins for NiFe hydrogenases and selenocysteine utilization, pointing towards  
218 importance of  $\text{H}_2$  metabolism and glycine reduction for these closely related phyla. More  
219 importantly, among bacterial phyla in the deep-branching group, “*Ca. Lithoacetigenota*”

220 represents the first lineage inhabiting hyperalkaliphilic serpentinite-hosted Hadean analogue  
221 ecosystems, suggesting that these organisms may be valuable extant windows into potential  
222 physiologies LUCA and/or early post-LUCA organisms may have taken (albeit with 4 billion  
223 years of evolution in between; see discussion regarding Grd below).

224

### 225 **Widespread glycine reduction in serpentinite-hosted systems**

226 Uncultured members of *Chloroflexi* (Chloroflexota) class *Dehalococcoidia* inhabiting The  
227 Cedars and *Firmicutes* (Firmicutes\_D) class SRB2 in Hakuba and The Cedars also possess  
228 glycine reductases (Table S3). In addition, these populations encode hydrogenases and formate  
229 dehydrogenases, suggesting that they may also link H<sub>2</sub> and formate metabolism to glycine  
230 reduction. Moreover, we further discover closely related glycine reductases in other studied  
231 serpentinite-hosted systems (47~94% amino acid similarity in Tablelands, Voltri Massif, and  
232 Coast Range Ophiolite) <sup>18,19,24</sup>. Phylogenetic analysis of the glycine-binding "protein B"  
233 subunit GrdB reveals close evolutionary relationships between glycine reductases from  
234 distant/remote sites (Fig. 2, S4, and S5). (Tablelands spring glycine reductase sequences were  
235 not included in the analysis as they were only detected in the unassembled metagenomic reads;  
236 4460690.3; 69.7~82.2% similarity to Hakuba SRB2). Overall, "*Ca. Lithoacetigenota*",  
237 *Dehalococcoidia*, and SRB2 glycine reductases are all detected in at least two out of the seven  
238 metagenomically investigated systems despite the diverse environmental conditions (*e.g.*,  
239 temperature), highlighting the potential importance of glycine metabolism by these clades in  
240 serpentinite-hosted systems. We suspect that glycine reduction may be a valuable catabolic  
241 strategy as the pathway requires few genes/proteins (a hydrogenase, Grd, acetate kinase, and  
242 thioredoxin oxidoreductase) and conveniently provides acetate, ammonia, and ATP as basic  
243 forms of carbon, nitrogen, and energy.

244

245 Comparison of the topology of the GrdB (Fig. 2, S4, and S5) and ribosomal protein (Fig.  
246 1a) trees hints towards vertical transfer of GrdB dating back to one of the deepest divisions in  
247 the bacterial domain. Given the ecosystem specificity and deep phylogeny of the newly  
248 discovered phylum and Grd, catabolic glycine reduction may be a relatively ancient  
249 metabolism viable in serpentinization-related habitats, rapidly lost due to its low utility in  
250 modern ecosystems (*e.g.*, no severe nutrient/electron acceptor limitation and no excess glycine  
251 via abiotic generation), but repurposed by some anaerobes for the fermentative Stickland  
252 reaction in organic-rich ecosystems (*e.g.*, faeces and biodigesters) where excess amino acids  
253 are available but no favorable electron acceptors are accessible (*i.e.*, anaerobic). We identified  
254 the first archaeal GRD (in Miscellaneous Crenarchaeota Group [MCG] or *Ca.* Bathyarchaeota  
255 member BA-1; Fig. 2, S4, and S5), but phylogenetic analysis shows that the gene was gained  
256 through horizontal transfer and whether this gene truly belongs to this clade remains to be  
257 verified given that the source is a metagenome-assembled genome. Thus, the currently  
258 available data suggests that Grd (and catabolic glycine reduction) is an ancient bacterial  
259 innovation (*i.e.*, originated in *Bacteria*) developed post-LUCA and largely exclusive to the  
260 domain *Bacteria*. Further investigation of Hadean analogues is necessary to verify the history  
261 of Grd (still unclear based on Bayesian inference of GrdB phylogeny; Fig. S5), uncover other  
262 basal Grd and explore whether glycine reduction (or Grd family proteins) can be dated back  
263 further (more ancient *Bacteria* or LUCA; *i.e.*, necessary to find more basal bacterial and/or  
264 archaeal homologs).

265

### 266 **Other characteristics of putative indigenous homoacetogens**

267 In contrast with members of “*Ca.* Lithoacetigenota”, several other putative homoacetogenic  
268 populations encode the complete Wood-Ljungdahl pathway (Table S2 and S3), indicating that  
269 other forms of acetogenesis may also be viable *in situ*. One putative homoacetogen in The

270 Cedars, NPL-UPA2, lacks hydrogenases but encodes formate dehydrogenases. Although the  
271 NPL-UPA2 population cannot perform H<sub>2</sub>/formate-driven acetogenesis, it may couple formate  
272 oxidation with formate-reducing acetogenesis – another thermodynamically viable metabolism  
273 ( $\Delta G$  of  $-50.90$  kJ per mol acetate in The Cedars; Fig. 1b). The pathway uses CO<sub>2</sub> as a substrate  
274 but has lower CO<sub>2</sub> consumption compared to H<sub>2</sub>/CO<sub>2</sub> homoacetogenesis and can produce  
275 intracellular CO<sub>2</sub> from formate. In Hakuba, an *Actinobacteria* population affiliated with the  
276 uncultured class UBA1414 (MAG HKB206) encodes hydrogenases and a complete Wood-  
277 Ljungdahl pathway (Table S3) and, thus, may be capable of H<sub>2</sub>/formate or the above formate-  
278 disproportionating acetogenesis (Fig. 1b). Indeed, the UBA1414 population was enriched in  
279 Hakuba-derived cultures aiming to enrich acetogens using the H<sub>2</sub> generated by the metallic  
280 iron–water reaction <sup>59</sup> (Fig. S7). Many populations encoding a complete Wood-Ljungdahl  
281 pathway possess monomeric CO dehydrogenases (CooS unassociated with CODH/ACS  
282 subunits; NPL-UPA2, *Actinobacteria*, *Syntrophomonadaceae* [Hakuba and The Cedars], and  
283 *Dehalococcoidia* [The Cedars]; Table S2). Although CO is below the detection limit in Hakuba  
284 (personal communication with permission from Dr. Konomi Suda), another study shows that  
285 CO metabolism takes place in an actively serpentinizing system with no detectable CO <sup>60</sup>.  
286 Given that CO is a known product of serpentinization <sup>24,60</sup>, it may be an important substrate for  
287 thermodynamically favorable acetogenesis *in situ*. However, further investigation is necessary  
288 to verify this.

289

290 Another interesting adaptation observed for all putative homoacetogens detected in Hakuba  
291 and The Cedars was possession of an unusual CODH/ACS complex. Although *Bacteria* and  
292 *Archaea* are known to encode structurally distinct forms of CODH/ACS (designated as Acs  
293 and Cdh respectively for this study), all studied Hakuba/The Cedars putative homoacetogens  
294 encode genes for a hybrid CODH/ACS that integrate archaeal subunits for the CO

295 dehydrogenase (AcsA replaced with CdhAB) and acetyl-CoA synthase (AcsB replaced with  
296 CdhC) and bacterial subunits for the corrinoid protein and methyltransferase components  
297 (AcsCDE) (Table S2). The *Firmicutes* lineages also additionally encode the conventional  
298 bacterial AcsABCDE. Given that all of the identified putative homoacetogens encode this  
299 peculiar hybrid complex, we suspect that such CODH/ACS's may have features that adapted  
300 to the high-pH low-CO<sub>2</sub> conditions (*e.g.*, high affinity for CO<sub>2</sub> and/or CO). In agreement, a  
301 similar hybrid CODH/ACS has also been found in "*Ca. Desulforudis audaxviator*" inhabiting  
302 an alkaline (pH 9.3) deep subsurface environment with a low CO<sub>2</sub> concentration (below  
303 detection limit <sup>61,62</sup>).

304

### 305 **Implications for primordial biology**

306 Based on one of the most plausible theories of the origin of life, LUCA inhabited alkaline  
307 geochemically active sites <sup>63</sup>, like serpentinite-hosted systems widespread across Earth during  
308 the Hadean to early Archean. Although reconstruction of the LUCA's physiology is  
309 challenging <sup>64</sup>, energy acquisition through H<sub>2</sub>-oxidation-driven CO<sub>2</sub> reduction to acetyl-CoA  
310 (*i.e.*, H<sub>2</sub>/CO<sub>2</sub> homoacetogenesis) is theorized to be a core feature of primordial metabolism <sup>11</sup>.  
311 However, the free energy yield of such homoacetogenesis decreases with CO<sub>2</sub> limitation and  
312 increasing temperature (Fig. S2a), suggesting that LUCA and/or early post-LUCA organisms  
313 may have encountered CO<sub>2</sub>-related thermodynamic challenges. Another study also points out  
314 that CO<sub>2</sub> speciation towards a less bioavailable form (carbonate) under hyperalkaline pH may  
315 have been a potential problem for primordial life <sup>65</sup>. At the interface of the alkaline fluids and  
316 seawater where life is thought to have originated <sup>7,15-17</sup>, H<sub>2</sub> and CO<sub>2</sub> from the respective fluids  
317 could have come in contact and allow CO<sub>2</sub>-dependent H<sub>2</sub> utilization; however, CO<sub>2</sub>-dependent  
318 metabolism would have become thermodynamically, and perhaps kinetically <sup>66</sup>, challenging as  
319 early post-LUCA organisms ventured away from the interface and deeper into serpentinite-

320 hosted systems. Through the investigation of CO<sub>2</sub>-poor Hadean analogues, we discover a novel  
321 Hadean analogue-exclusive alkaliphilic phylum that belongs to a deep-branching group of  
322 bacterial phyla and possesses unconventional thermodynamically favorable less CO<sub>2</sub>-  
323 dependent H<sub>2</sub>-oxidizing metabolic strategies (*e.g.*, coupled with formate or glycine reduction)  
324 that may be compelling candidates for early H<sub>2</sub>-dependent lithotrophy.

325

326 The thermodynamic and energetic favorability of catabolic H<sub>2</sub>-oxidizing glycine reduction  
327 mediated by GRD makes it a competitive metabolism for primordial *Bacteria*. Catabolic H<sub>2</sub>-  
328 utilizing glycine reduction also draws remarkable parallels with homoacetogenesis and  
329 ancestral archaeal metabolism. Like homoacetogenesis, glycine reduction has a rare feature  
330 thought to be essential for primordial metabolism – the ability to reductively synthesize acyl-  
331 phosphate for substrate-level phosphorylation in the cytosol<sup>67-70</sup> – indicating high utility for  
332 ancient organisms. Glycine reduction also shares features with a metabolism recently proposed  
333 to be ancestral in *Archaea* – H<sub>2</sub>-oxidizing methyl-reducing methanogenesis<sup>71,72</sup>. Both are  
334 (nearly) domain-exclusive, potentially primordial, CO<sub>2</sub>-independent, and energetically more  
335 efficient than H<sub>2</sub>/CO<sub>2</sub>-driven acetogenesis (in terms of energy recovered per mol H<sub>2</sub>). Moreover,  
336 both utilize reduced serpentinization-derived carbon compounds, a thiol/disulfide electron  
337 carrier as an electron donor, and NiFe hydrogenases as an upstream electron source (Fig. 3). It  
338 is tempting to speculate that early post-LUCA *Bacteria* and *Archaea* both integrated geogenic  
339 thermodynamically favorable electron acceptors to adapt to thrive under the extreme conditions  
340 and interestingly occupied non-competing niches by using different acceptors (glycine and  
341 methyl compounds respectively) and energy acquisition strategies (substrate-level  
342 phosphorylation and proton motive force respectively), whereby allowing the two to co-exist  
343 with little competition. If true, we may begin to speculate that, as *Bacteria* and *Archaea* weaned  
344 themselves from serpentinite-hosted systems and explored the non-alkaline habitats of Earth,

345 GRD and MCR were connected to the methyl branch of the Wood-Ljungdahl pathway and  
346 repurposed to facilitate CO<sub>2</sub> fixation<sup>73</sup> and CO<sub>2</sub>-reducing methanogenesis respectively, both  
347 CO<sub>2</sub>-dependent pathways relevant today. However, further investigations are necessary to  
348 verify because, unlike MCR, information on GRD is limited: glycine-mediated autotrophy was  
349 only discovered recently, organisms still using GRD for catabolic glycine reduction are low in  
350 diversity on modern Earth given the abundant availability of other electron acceptors, and the  
351 geobiology of glycine-generating serpentinite-hosted systems have not been studied  
352 extensively.

353

354 As was the case for MCR, metagenomic exploration of the uncharted rare biosphere  
355 provided key data for genes and core pathways that provide a glimpse into how primordial life  
356 or early bacteria may have proliferated (though we must still take caution in interpretation  
357 given the uncertainty associated with metagenomics). The thermodynamic (i.e., more favorable  
358 than the CO<sub>2</sub>-reducing counterpart) and evolutionary (i.e., ancestral) parallels between archaeal  
359 methyl-reducing and bacterial glycine-reducing H<sub>2</sub>-dependent lithotrophy warrant  
360 investigation of whether these metabolisms did indeed play a role in the formation or fixation  
361 of the two domains. Further studies on the evolutionary origin, antiquity, and history of glycine  
362 reduction will shed light on primordial way of life as well as bacterial/prokaryotic  
363 diversification.

364

### 365 **Author contribution**

366 MKN and RN designed and performed metagenomic, phylogenetic, and thermodynamic  
367 analyses, interpreted the data, and wrote the manuscript. ST performed sampling, DNA  
368 extraction, and cultivation. HM, AT, and KK performed metagenomic sequencing and  
369 metagenomic analysis. AI performed chemical measurements. SS supported chemical data

370 collection. HT and YK designed the project, supervised sampling and cultivation, and  
371 supported manuscript preparation.

372

### 373 **Acknowledgements**

374 The authors greatly appreciate Mr. Sejima and others of Happo-one Development Co., Ltd. for  
375 their kind permission and cooperation in conducting field studies at Hakuba Happo hot springs.

376 This work was supported by the JSPS KAKENHI Grant-in-Aid for Scientific Research on  
377 Innovative Areas, “Hadean Bioscience” project (no. JP26106006). This work was partly  
378 funded by the JSPS KAKENHI Grant-in-aid for Scientific Research nos. JP26710012 and  
379 JP18H02426 to H. Tamaki, JP15H05620 to R. Nakai, and JP18H03367 to M.K. Nobu.

380

### 381 **Competing interests**

382 The authors declare no competing interests.



383 **References**

- 384 1 Schrenk, M. O., Brazelton, W. J. & Lang, S. Q. Serpentinization, Carbon, and Deep  
385 Life. *Reviews in Mineralogy and Geochemistry* **75**, 575-606,  
386 doi:10.2138/rmg.2013.75.18 (2013).
- 387 2 Komiya, T., Maruyama, S., Hirata, T., Yurimoto, H. & Nohda, S. Geochemistry of  
388 the oldest MORB and OIB in the Isua Supracrustal Belt, southern West Greenland:  
389 Implications for the composition and temperature of early Archean upper mantle.  
390 *Island Arc* **13**, 47-72, doi:10.1111/j.1440-1738.2003.00416.x (2004).
- 391 3 Sleep, N. H., Bird, D. K. & Pope, E. C. Serpentinite and the dawn of life.  
392 *Philosophical Transactions of the Royal Society B: Biological Sciences* **366**, 2857  
393 (2011).
- 394 4 Martin, W. F. & Sousa, F. L. Early Microbial Evolution: The Age of Anaerobes. *Cold  
395 Spring Harbor Perspectives in Biology* **8**, doi:10.1101/cshperspect.a018127 (2016).
- 396 5 Lane, N. & Martin, William F. The Origin of Membrane Bioenergetics. *Cell* **151**,  
397 1406-1416, doi:<https://doi.org/10.1016/j.cell.2012.11.050> (2012).
- 398 6 Battistuzzi, F. U., Feijao, A. & Hedges, S. B. A genomic timescale of prokaryote  
399 evolution: insights into the origin of methanogenesis, phototrophy, and the  
400 colonization of land. *BMC Evolutionary Biology* **4**, 44, doi:10.1186/1471-2148-4-44  
401 (2004).
- 402 7 Shibuya, T. *et al.* Hydrogen-rich hydrothermal environments in the Hadean ocean  
403 inferred from serpentinization of komatiites at 300 °C and 500 bar. *Progress in Earth  
404 and Planetary Science* **2**, 46, doi:10.1186/s40645-015-0076-z (2015).
- 405 8 Camprubi, E., Jordan, S. F., Vasiliadou, R. & Lane, N. Iron catalysis at the origin of  
406 life. *IUBMB life* **69**, 373-381, doi:10.1002/iub.1632 (2017).
- 407 9 Decker, K., Jungermann, K. & Thauer, R. K. Energy Production in Anaerobic  
408 Organisms. *Angewandte Chemie International Edition in English* **9**, 138-158,  
409 doi:10.1002/anie.197001381 (1970).
- 410 10 Martin, W. F., Weiss, M. C., Neukirchen, S., Nelson-Sathi, S. & Sousa, F. L.  
411 Physiology, phylogeny, and LUCA. *Microbial Cell* **3**, 582-587,  
412 doi:10.15698/mic2016.12.545 (2016).
- 413 11 Weiss, M. C. *et al.* The physiology and habitat of the last universal common ancestor.  
414 *Nature Microbiology* **1**, 16116, doi:10.1038/nmicrobiol.2016.116  
415 <https://www.nature.com/articles/nmicrobiol2016116#supplementary-information> (2016).
- 416 12 Adam, P. S., Borrel, G. & Gribaldo, S. Evolutionary history of carbon monoxide  
417 dehydrogenase/acetyl-CoA synthase, one of the oldest enzymatic complexes.  
418 *Proceedings of the National Academy of Sciences* **115**, E1166,  
419 doi:10.1073/pnas.1716667115 (2018).
- 420 13 Preiner, M. *et al.* A hydrogen-dependent geochemical analogue of primordial carbon  
421 and energy metabolism. *Nat Ecol Evol* **4**, 534-542, doi:10.1038/s41559-020-1125-6  
422 (2020).
- 423 14 Martin, W. F. Older Than Genes: The Acetyl CoA Pathway and Origins. *Frontiers in  
424 microbiology* **11**, 817-817, doi:10.3389/fmicb.2020.00817 (2020).
- 425 15 Lane, N. Proton gradients at the origin of life. *Bioessays* **39**, 1600217,  
426 doi:<https://doi.org/10.1002/bies.201600217> (2017).
- 427 16 Shibuya, T., Russell, M. J. & Takai, K. Free energy distribution and hydrothermal  
428 mineral precipitation in Hadean submarine alkaline vent systems: Importance of iron  
429 redox reactions under anoxic conditions. *Geochim Cosmochim Acta* **175**, 1-19,  
430 doi:<https://doi.org/10.1016/j.gca.2015.11.021> (2016).

- 431 17 Sojo, V., Herschy, B., Whicher, A., Camprubí, E. & Lane, N. The Origin of Life in  
432 Alkaline Hydrothermal Vents. *Astrobiology* **16**, 181-197, doi:10.1089/ast.2015.1406  
433 (2016).
- 434 18 Brazelton, W. J. *et al.* Metagenomic identification of active methanogens and  
435 methanotrophs in serpentinite springs of the Voltri Massif, Italy. *PeerJ* **5**, e2945,  
436 doi:10.7717/peerj.2945 (2017).
- 437 19 Brazelton, W. J., Nelson, B. & Schrenk, M. O. Metagenomic Evidence for H<sub>2</sub>(  
438 Oxidation and H<sub>2</sub>) Production by Serpentinite-Hosted Subsurface Microbial  
439 Communities. *Frontiers in Microbiology* **2**, 268, doi:10.3389/fmicb.2011.00268  
440 (2011).
- 441 20 Suzuki, S. *et al.* Unusual metabolic diversity of hyperalkaliphilic microbial  
442 communities associated with subterranean serpentinitization at The Cedars. *Isme J* **11**,  
443 2584-2598, doi:10.1038/ismej.2017.111 (2017).
- 444 21 Kelley, D. S. *et al.* A Serpentinite-Hosted Ecosystem: The Lost City Hydrothermal  
445 Field. *Science* **307**, 1428-1434, doi:10.1126/science.1102556 (2005).
- 446 22 Tiago, I. & Verissimo, A. Microbial and functional diversity of a subterrestrial high  
447 pH groundwater associated to serpentinitization. *Environ Microbiol* **15**, 1687-1706,  
448 doi:10.1111/1462-2920.12034 (2013).
- 449 23 Crespo-Medina, M. *et al.* Methane Dynamics in a Tropical Serpentinizing  
450 Environment: The Santa Elena Ophiolite, Costa Rica. *Frontiers in Microbiology* **8**,  
451 916, doi:10.3389/fmicb.2017.00916 (2017).
- 452 24 Twing, K. I. *et al.* Serpentinization-Influenced Groundwater Harbors Extremely Low  
453 Diversity Microbial Communities Adapted to High pH. *Frontiers in Microbiology* **8**,  
454 308, doi:10.3389/fmicb.2017.00308 (2017).
- 455 25 Neubeck, A. *et al.* Microbial Community Structure in a Serpentine-Hosted Abiotic  
456 Gas Seepage at the Chimaera Ophiolite, Turkey. *Appl Environ Microb* **83**,  
457 doi:10.1128/aem.03430-16 (2017).
- 458 26 Morrill, P. L. *et al.* Geochemistry and geobiology of a present-day serpentinitization  
459 site in California: The Cedars. *Geochim Cosmochim Ac* **109**, 222-240,  
460 doi:<https://doi.org/10.1016/j.gca.2013.01.043> (2013).
- 461 27 Suda, K., Gilbert, A., Yamada, K., Yoshida, N. & Ueno, Y. Compound- and  
462 position-specific carbon isotopic signatures of abiogenic hydrocarbons from on-land  
463 serpentinite-hosted Hakuba Happo hot spring in Japan. *Geochim Cosmochim Ac* **206**,  
464 201-215, doi:<https://doi.org/10.1016/j.gca.2017.03.008> (2017).
- 465 28 Suda, K. *et al.* Origin of methane in serpentinite-hosted hydrothermal systems: The  
466 CH<sub>4</sub>-H<sub>2</sub>-H<sub>2</sub>O hydrogen isotope systematics of the Hakuba Happo hot spring. *Earth  
467 and Planetary Science Letters* **386**, 112-125,  
468 doi:<https://doi.org/10.1016/j.epsl.2013.11.001> (2014).
- 469 29 Suda, K. *Origins of Hydrocarbons in On-land Serpentinization Fields and Insights  
470 into Hadean Hydrothermal Systems: Systematic Study using Stable Isotopes* Ph.D.  
471 thesis, Tokyo Institute of Technology, (2016).
- 472 30 Schink, B. Energetics of syntrophic cooperation in methanogenic degradation.  
473 *Microbiology and Molecular Biology Reviews* **61**, 262-280 (1997).
- 474 31 Suzuki, S., Nealson, K. H. & Ishii, S. i. Genomic and in-situ Transcriptomic  
475 Characterization of the Candidate Phylum NPL-UPL2 From Highly Alkaline Highly  
476 Reducing Serpentinized Groundwater. **9**, doi:10.3389/fmicb.2018.03141 (2018).
- 477 32 Morandi, P., Valzasina, B., Colombo, C., Curti, B. & Vanoni, M. A. Glutamate  
478 synthase: identification of the NADPH-binding site by site-directed mutagenesis.  
479 *Biochemistry-Us* **39**, 727-735, doi:10.1021/bi9920329 (2000).

- 480 33 Schneider, K. & Schlegel, H. G. Purification and properties of soluble hydrogenase  
481 from *Alcaligenes eutrophus* H 16. *Biochimica et biophysica acta* **452**, 66-80 (1976).
- 482 34 Burgdorf, T. *et al.* The Soluble NAD(+)-Reducing [NiFe]-Hydrogenase from  
483 *Ralstonia eutropha* H16 Consists of Six Subunits and Can Be Specifically Activated  
484 by NADPH. *J Bacteriol* **187**, 3122-3132, doi:10.1128/JB.187.9.3122-3132.2005  
485 (2005).
- 486 35 de Luca, G., de Philip, P., Rousset, M., Belaich, J. P. & Dermoun, Z. The NADP-  
487 reducing hydrogenase of *Desulfovibrio fructosovorans*: evidence for a native complex  
488 with hydrogen-dependent methyl-viologen-reducing activity. *Biochemical and*  
489 *biophysical research communications* **248**, 591-596, doi:10.1006/bbrc.1998.9022  
490 (1998).
- 491 36 Schut, G. J. & Adams, M. W. The iron-hydrogenase of *Thermotoga maritima* utilizes  
492 ferredoxin and NADH synergistically: a new perspective on anaerobic hydrogen  
493 production. *J Bacteriol* **191**, 4451-4457, doi:10.1128/JB.01582-08 (2009).
- 494 37 de Bok, F. A. *et al.* Two W-containing formate dehydrogenases (CO<sub>2</sub>-reductases)  
495 involved in syntrophic propionate oxidation by *Syntrophobacter fumaroxidans*.  
496 *European journal of biochemistry / FEBS* **270**, 2476-2485 (2003).
- 497 38 Yamamoto, I., Saiki, T., Liu, S. M. & Ljungdahl, L. G. Purification and properties of  
498 NADP-dependent formate dehydrogenase from *Clostridium thermoaceticum*, a  
499 tungsten-selenium-iron protein. *J Biol Chem* **258**, 1826-1832 (1983).
- 500 39 Hidalgo-Ahumada, C. A. P. *et al.* Novel energy conservation strategies and behaviour  
501 of *Pelotomaculum schinkii* driving syntrophic propionate catabolism. *Environ*  
502 *Microbiol* **20**, 4503-4511, doi:10.1111/1462-2920.14388 (2018).
- 503 40 Nobu, M. K. *et al.* Microbial dark matter ecogenomics reveals complex synergistic  
504 networks in a methanogenic bioreactor. *Isme J* **9**, 1710-1722,  
505 doi:10.1038/ismej.2014.256 (2015).
- 506 41 Poehlein, A. *et al.* An ancient pathway combining carbon dioxide fixation with the  
507 generation and utilization of a sodium ion gradient for ATP synthesis. *PLoS One* **7**,  
508 e33439, doi:10.1371/journal.pone.0033439 (2012).
- 509 42 Fuchida, S., Mizuno, Y., Masuda, H., Toki, T. & Makita, H. Concentrations and  
510 distributions of amino acids in black and white smoker fluids at temperatures over  
511 200°C. *Org Geochem* **66**, 98-106,  
512 doi:<https://doi.org/10.1016/j.orggeochem.2013.11.008> (2014).
- 513 43 Haberstroh, P. R. & Karl, D. M. Dissolved free amino acids in hydrothermal vent  
514 habitats of the Guaymas Basin. *Geochim Cosmochim Acta* **53**, 2937-2945,  
515 doi:[https://doi.org/10.1016/0016-7037\(89\)90170-1](https://doi.org/10.1016/0016-7037(89)90170-1) (1989).
- 516 44 Svensson, E., Skoog, A. & Amend, J. P. Concentration and distribution of dissolved  
517 amino acids in a shallow hydrothermal system, Vulcano Island (Italy). *Org Geochem*  
518 **35**, 1001-1014, doi:<https://doi.org/10.1016/j.orggeochem.2004.05.005> (2004).
- 519 45 Fox, S. W. & Windsor, C. R. Synthesis of amino acids by the heating of  
520 formaldehyde and ammonia. *Science* **170**, 984-986 (1970).
- 521 46 Islam, M. N., Kaneko, T. & Kobayashi, K. in *Analytical Sciences/Supplements*  
522 *Proceedings of IUPAC International Congress on Analytical Sciences 2001 (ICAS*  
523 *2001)*. i1631-i1634 (The Japan Society for Analytical Chemistry).
- 524 47 Inaba, S. Primary Formation Path of Formaldehyde in Hydrothermal Vents. *Origins*  
525 *of Life and Evolution of Biospheres* **48**, 1-22, doi:10.1007/s11084-017-9550-5 (2018).
- 526 48 Andreesen, J. R. Glycine reductase mechanism. *Curr Opin Chem Biol* **8**, 454-461,  
527 doi:10.1016/j.cbpa.2004.08.002 (2004).
- 528 49 Andreesen, J. R. in *Acetogenesis* (ed Harold L. Drake) 568-629 (Springer US,  
529 1994).

- 530 50 Nisman, B. The Stickland reaction. *Bacteriological Reviews* **18**, 16-42 (1954).
- 531 51 Hormann, K. & Andreesen, J. R. Reductive cleavage of sarcosine and betaine by  
532 Eubacterium acidaminophilum via enzyme systems different from glycine reductase.  
533 *Archives of Microbiology* **153**, 50-59, doi:10.1007/bf00277541 (1989).
- 534 52 Moune, S. *et al.* *Haloanaerobacter salinarius* sp. nov., a novel halophilic  
535 fermentative bacterium that reduces glycine-betaine to trimethylamine with hydrogen  
536 or serine as electron donors; emendation of the genus *Haloanaerobacter*. *Int J Syst*  
537 *Bacteriol* **49 Pt 1**, 103-112, doi:10.1099/00207713-49-1-103 (1999).
- 538 53 Hamdi, O. *et al.* *Aminobacterium thunnarium* sp. nov., a mesophilic, amino acid-  
539 degrading bacterium isolated from an anaerobic sludge digester, pertaining to the  
540 phylum Synergistetes. *Int J Syst Evol Microbiol* **65**, 609-614,  
541 doi:10.1099/ijs.0.068965-0 (2015).
- 542 54 Nakai, R., Baba, T., Niki, H., Nishijima, M. & Naganuma, T. *Aurantimicrobium*  
543 *minutum* gen. nov., sp. nov., a novel ultramicrobacterium of the family  
544 *Microbacteriaceae*, isolated from river water. *Int J Syst Evol Microbiol* **65**, 4072-  
545 4079, doi:10.1099/ijsem.0.000541 (2015).
- 546 55 Nakai, R. *et al.* Complete Genome Sequence of *Aurantimicrobium minutum* Type  
547 Strain KNCT, a Planktonic Ultramicrobacterium Isolated from River Water. *Genome*  
548 *announcements* **4**, doi:10.1128/genomeA.00616-16 (2016).
- 549 56 Giovannoni, S. J. *et al.* Genome streamlining in a cosmopolitan oceanic bacterium.  
550 *Science* **309**, 1242-1245, doi:10.1126/science.1114057 (2005).
- 551 57 Hahn, M. W., Schmidt, J., Taipale, S. J., Doolittle, W. F. & Koll, U. *Rhodoluna*  
552 *lacicola* gen. nov., sp. nov., a planktonic freshwater bacterium with stream-lined  
553 genome. *Int J Syst Evol Microbiol* **64**, 3254-3263, doi:10.1099/ijs.0.065292-0 (2014).
- 554 58 Betts, H. C. *et al.* Integrated genomic and fossil evidence illuminates life's early  
555 evolution and eukaryote origin. *Nature Ecology & Evolution* **2**, 1556-1562,  
556 doi:10.1038/s41559-018-0644-x (2018).
- 557 59 Kato, S., Yumoto, I. & Kamagata, Y. Isolation of Acetogenic Bacteria That Induce  
558 Biocorrosion by Utilizing Metallic Iron as the Sole Electron Donor. *Appl Environ*  
559 *Microb* **81**, 67-73, doi:10.1128/aem.02767-14 (2015).
- 560 60 Morrill, P. L. *et al.* Investigations of potential microbial methanogenic and carbon  
561 monoxide utilization pathways in ultra-basic reducing springs associated with present-  
562 day continental serpentinization: the Tablelands, NL, CAN. *Frontiers in*  
563 *Microbiology* **5**, doi:10.3389/fmicb.2014.00613 (2014).
- 564 61 Chivian, D. *et al.* Environmental genomics reveals a single-species ecosystem deep  
565 within Earth. *Science* **322**, 275-278, doi:10.1126/science.1155495 (2008).
- 566 62 Lin, L.-H. *et al.* Long-Term Sustainability of a High-Energy, Low-Diversity Crustal  
567 Biome. *Science* **314**, 479 (2006).
- 568 63 Martin, W. & Russell, M. J. On the origin of biochemistry at an alkaline hydrothermal  
569 vent. *Philosophical Transactions of the Royal Society B: Biological Sciences* **362**,  
570 1887 (2007).
- 571 64 Berkemer, S. J. & McGlynn, S. E. A New Analysis of Archaea–Bacteria Domain  
572 Separation: Variable Phylogenetic Distance and the Tempo of Early Evolution.  
573 *Molecular Biology and Evolution* **37**, 2332-2340, doi:10.1093/molbev/msaa089  
574 (2020).
- 575 65 Boyd, E. S., Amenabar, M. J., Poudel, S. & Templeton, A. S. Bioenergetic constraints  
576 on the origin of autotrophic metabolism. *Philosophical Transactions of the Royal*  
577 *Society A: Mathematical, Physical and Engineering Sciences* **378**, 20190151,  
578 doi:doi:10.1098/rsta.2019.0151 (2020).

- 579 66 Gonzalez-Cabaleiro, R., Lema, J. M., Rodriguez, J. & Kleerebezem, R. Linking  
580 thermodynamics and kinetics to assess pathway reversibility in anaerobic  
581 bioprocesses. *Energy & Environmental Science* **6**, 3780-3789,  
582 doi:10.1039/C3EE42754D (2013).
- 583 67 Martin, W. F. & Thauer, R. K. Energy in Ancient Metabolism. *Cell* **168**, 953-955,  
584 doi:10.1016/j.cell.2017.02.032 (2017).
- 585 68 Lipmann, F. in *The Origins of Prebiological Systems and of their Molecular Matrices*  
586 259-280 (Elsevier, 1965).
- 587 69 Decker, K., Jungermann, K. & Thauer, R. K. Energy production in anaerobic  
588 organisms. *Angew Chem Int Ed Engl* **9**, 138-158, doi:10.1002/anie.197001381 (1970).
- 589 70 Ferry, J. G. & House, C. H. The Stepwise Evolution of Early Life Driven by Energy  
590 Conservation. *Molecular Biology and Evolution* **23**, 1286-1292,  
591 doi:10.1093/molbev/msk014 (2006).
- 592 71 Baker, B. J. *et al.* Diversity, ecology and evolution of Archaea. *Nature Microbiology*  
593 **5**, 887-900, doi:10.1038/s41564-020-0715-z (2020).
- 594 72 Borrel, G. *et al.* Wide diversity of methane and short-chain alkane metabolisms in  
595 uncultured archaea. *Nature Microbiology* **4**, 603-613, doi:10.1038/s41564-019-0363-  
596 3 (2019).
- 597 73 Sánchez-Andrea, I. *et al.* The reductive glycine pathway allows autotrophic growth of  
598 *Desulfovibrio desulfuricans*. *Nature Communications* **11**, 5090, doi:10.1038/s41467-  
599 020-18906-7 (2020).
- 600 74 Nobu, M. K., Narihiro, T., Kuroda, K., Mei, R. & Liu, W. T. Chasing the elusive  
601 *Euryarchaeota* class WSA2: genomes reveal a uniquely fastidious methyl-reducing  
602 methanogen. *Isme J* **10**, 2478-2487, doi:10.1038/ismej.2016.33 (2016).
- 603 75 Heuer, V. *et al.* Online  $\delta^{13}\text{C}$  analysis of volatile fatty acids in sediment/porewater  
604 systems by liquid chromatography - isotope ratio mass spectrometry. *Limnology and*  
605 *Oceanography: Methods* **4**, 346-357, doi:doi:10.4319/lom.2006.4.346 (2006).
- 606 76 Ijiri, A. *et al.* Biogeochemical processes involving acetate in sub-seafloor sediments  
607 from the Bering Sea shelf break. *Org Geochem* **48**, 47-55,  
608 doi:<https://doi.org/10.1016/j.orggeochem.2012.04.004> (2012).
- 609 77 Hanselmann, K. W. Microbial energetics applied to waste repositories. *Experientia*  
610 **47**, 645-687, doi:10.1007/BF01958816 (1991).
- 611 78 Wang, G., Spivack, A. J. & D'Hondt, S. Gibbs energies of reaction and microbial  
612 mutualism in anaerobic deep subseafloor sediments of ODP Site 1226. *Geochim*  
613 *Cosmochim Acta* **74**, 3938-3947, doi:<https://doi.org/10.1016/j.gca.2010.03.034> (2010).
- 614 79 Mason, O. U. *et al.* Metagenome, metatranscriptome and single-cell sequencing  
615 reveal microbial response to Deepwater Horizon oil spill. *Isme J* **6**, 1715-1727,  
616 doi:10.1038/ismej.2012.59 (2012).
- 617 80 Bolger, A. M., Lohse, M. & Usadel, B. Trimmomatic: a flexible trimmer for Illumina  
618 sequence data. *Bioinformatics* **30**, 2114-2120, doi:10.1093/bioinformatics/btu170  
619 (2014).
- 620 81 Bankevich, A. *et al.* SPAdes: a new genome assembly algorithm and its applications  
621 to single-cell sequencing. *Journal of computational biology* **19**, 455-477,  
622 doi:10.1089/cmb.2012.0021 (2012).
- 623 82 Wu, Y.-W., Simmons, B. A. & Singer, S. W. MaxBin 2.0: an automated binning  
624 algorithm to recover genomes from multiple metagenomic datasets. *Bioinformatics*  
625 **32**, 605-607, doi:10.1093/bioinformatics/btv638 (2016).
- 626 83 Wu, Y. W., Tang, Y. H., Tringe, S. G., Simmons, B. A. & Singer, S. W. MaxBin: an  
627 automated binning method to recover individual genomes from metagenomes using

- 628 an expectation-maximization algorithm. *Microbiome* **2**, 26, doi:10.1186/2049-2618-2-  
629 26 (2014).
- 630 84 Parks, D. H., Imelfort, M., Skennerton, C. T., Hugenholtz, P. & Tyson, G. W.  
631 CheckM: assessing the quality of microbial genomes recovered from isolates, single  
632 cells, and metagenomes. *Genome Res* **25**, 1043-1055, doi:10.1101/gr.186072.114  
633 (2015).
- 634 85 Seemann, T. Prokka: rapid prokaryotic genome annotation. *Bioinformatics* **30**, 2068-  
635 2069, doi:10.1093/bioinformatics/btu153 (2014).
- 636 86 Huerta-Cepas, J. *et al.* eggNOG 4.5: a hierarchical orthology framework with  
637 improved functional annotations for eukaryotic, prokaryotic and viral sequences.  
638 *Nucleic Acids Res* **44**, D286-D293, doi:10.1093/nar/gkv1248 (2016).
- 639 87 Katoh, K., Kuma, K.-i., Toh, H. & Miyata, T. MAFFT version 5: improvement in  
640 accuracy of multiple sequence alignment. *Nucleic Acids Res* **33**, 511-518,  
641 doi:10.1093/nar/gki198 (2005).
- 642 88 Capella-Gutiérrez, S., Silla-Martínez, J. M. & Gabaldón, T. trimAl: a tool for  
643 automated alignment trimming in large-scale phylogenetic analyses. *Bioinformatics*  
644 **25**, 1972-1973, doi:10.1093/bioinformatics/btp348 (2009).
- 645 89 Imachi, H. *et al.* Isolation of an archaeon at the prokaryote-eukaryote interface.  
646 *Nature* **577**, 519-525, doi:10.1038/s41586-019-1916-6 (2020).
- 647 90 Parks, D. H. *et al.* A complete domain-to-species taxonomy for Bacteria and Archaea.  
648 *Nat Biotechnol*, doi:10.1038/s41587-020-0501-8 (2020).
- 649 91 Guindon, S. *et al.* New Algorithms and Methods to Estimate Maximum-Likelihood  
650 Phylogenies: Assessing the Performance of PhyML 3.0. *Systematic Biology* **59**, 307-  
651 321, doi:10.1093/sysbio/syq010 (2010).
- 652 92 Le, S. Q. & Gascuel, O. An improved general amino acid replacement matrix. *Mol*  
653 *Biol Evol* **25**, 1307-1320, doi:10.1093/molbev/msn067 (2008).
- 654 93 Lemoine, F. *et al.* Renewing Felsenstein's phylogenetic bootstrap in the era of big  
655 data. *Nature* **556**, 452-456, doi:10.1038/s41586-018-0043-0 (2018).
- 656 94 Fu, L., Niu, B., Zhu, Z., Wu, S. & Li, W. CD-HIT: accelerated for clustering the next-  
657 generation sequencing data. *Bioinformatics* **28**, 3150-3152,  
658 doi:10.1093/bioinformatics/bts565 (2012).
- 659

660 **Figures**

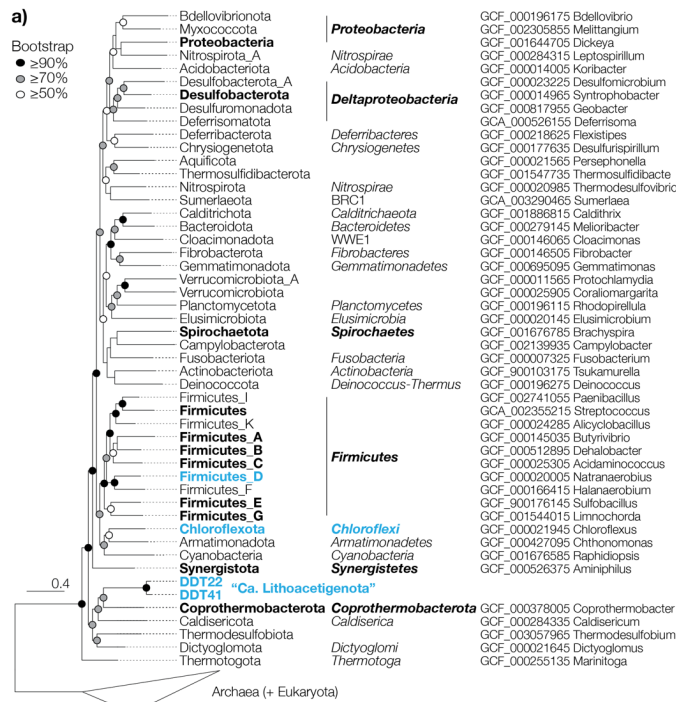

**Figure 1.** “*Ca. Lithoacetigenota*” phylogeny, lithotrophic acetate generation pathways, and comparative genomics with neighboring phyla. (a) A maximum likelihood tree was calculated using PhyML using the LG model, 4 gamma categories, and 100 bootstrap replicates from a concatenated alignment of universally conserved ribosomal protein sequences from representative genomes of individual phyla aligned with MAFFT (default parameters) and trimmed with trimAl prior to concatenation. Bootstrap values were recalculated using BOOSTER. Phyla that possess glycine reductases (black+bolded) and phyla for which glycine reductases were detected in serpentinite-hosted systems are indicated (blue+bolded). Phylum names are shown for both NCBI taxonomy (italicized) and GTDB classification. (b) Metabolic pathways potentially adapted to the CO<sub>2</sub>-limited hyperalkaline conditions encoded by “*Ca. Lithoacetigenota*” members and others: formate- and glycine-reducing acetate generation. Arrow colors indicate oxidative (pink), reductive (blue), ATP-yielding (orange), and ATP-consuming (green) steps. (c) Venn diagram of COGs/NOGs (as predicted by eggno-mapper) fully conserved across all members of each phylum (genomes included in GTDB release 95 with completeness ≥85% and contamination ≤5%). COGs/NOGs related to lithotrophy and alkaliphily are highlighted. \* “COG” abbreviated.

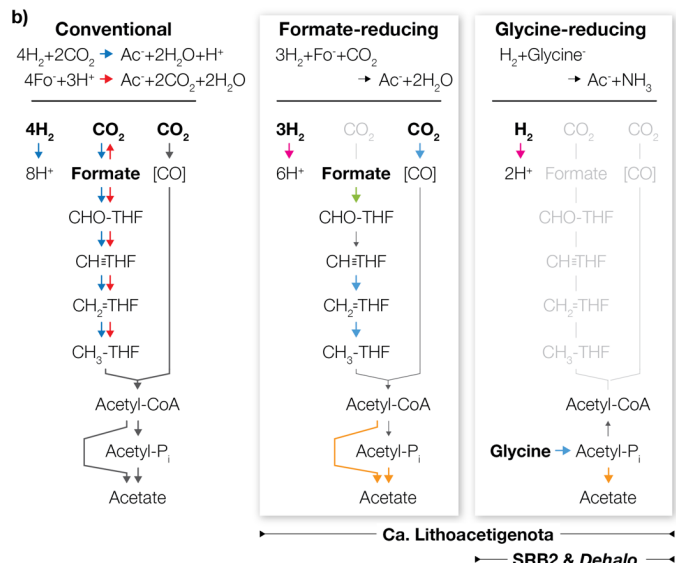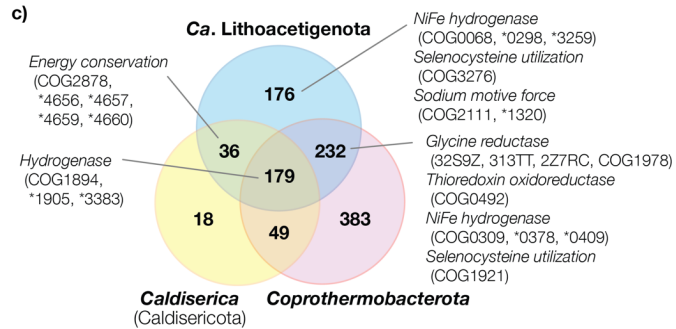

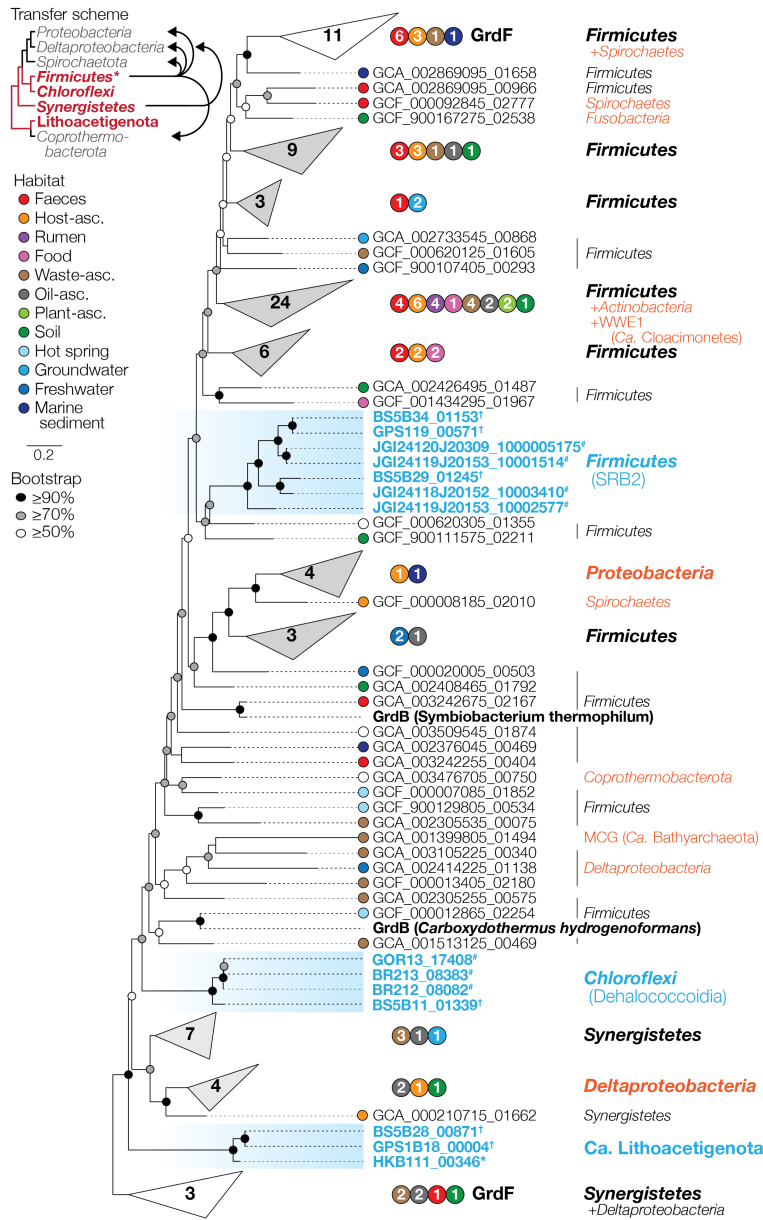

**Figure 2.** Phylogeny of serpentinite-hosted microbiome glycine reductase subunit GrdB homologs (Hakuba Happo hot spring\*, The Cedars springs†, and other serpentinite-hosted system metagenomes#) and a brief scheme for evolutionary history of Grd. COG1978 homologs were collected from the representative species genomes in GTDB, filtered using a GrdB motif conserved across members of phyla known to perform glycine-reducing Stickland reaction and a GrdF motif conserved across sequences that form a distinct cluster around the biochemically characterized *Peptoclostridium acidaminophilum* sarcosine reductase subunit GrdF (see Methods and Supplementary Fig. S4), and clustered with 75% amino acid sequence similarity using CD-HIT (-c 0.75). A maximum likelihood tree was calculated as described in Fig. 1. For each sequence, the original habitat the isolate or MAG was obtained from is shown (white circle = unknown). Large sequence clusters were grouped (number of representative

736 sequences included are shown). Note that the outgroup is a cluster of uncharacterized  
 737 *Synergistetes* and *Deltaproteobacteria* sequences that was inferred to function as GrdF given  
 738 that it shares the motif found in the *Firmicutes* GrdF. Taxa thought to have gained GrdB  
 739 through horizontal transfer are shown in orange. See Supplementary Fig. S4 for complete tree.  
 740 In the brief scheme of Grd evolution, the cladogram topology is based on Fig. 1a. Vertical  
 741 transfer (red lines in cladogram) and horizontal transfer (black arrows) inferred from tree  
 742 structures are shown. Phyla that may have acquired Grd vertically (red) and horizontally (gray)  
 743 are indicated. GTDB phyla belonging to *Firmicutes* were grouped together.  
 744



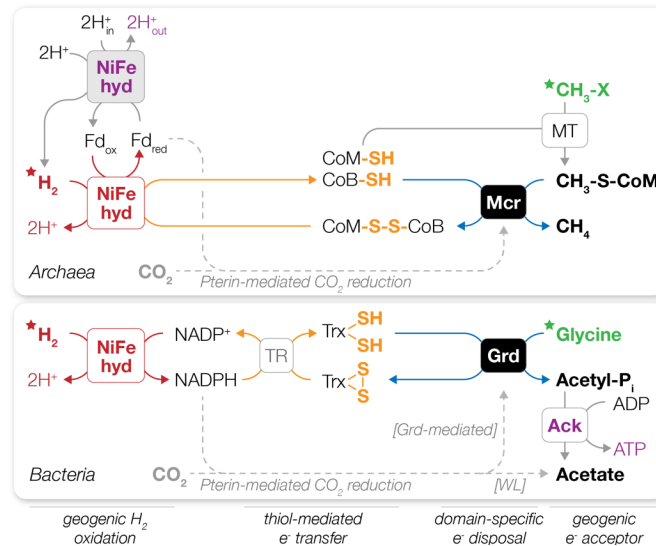

745  
746

747 **Figure 3.** Proposed non-CO<sub>2</sub>-reducing metabolic strategies of ancestral archaea and bacteria  
 748 inhabiting serpentinite-hosted systems. Geogenic carbon compounds, in particular methyl  
 749 groups for archaea and glycine for bacteria (marked by a green star), can serve as electron  
 750 acceptors for the oxidation of geogenic H<sub>2</sub> (red star). The bacterial glycine-reducing H<sub>2</sub>-  
 751 dependent lithotrophy is strategically similar to the ancestral archaeal methyl-reducing  
 752 methanogenesis recently suggested<sup>71,72</sup>. Both reactions can be mediated by nickel-iron [NiFe]  
 753 hydrogenase H<sub>2</sub> oxidation (red) and reduction of thiol/disulfide electron carriers (orange) and  
 754 forgo pterin-mediated CO<sub>2</sub> reduction (gray dotted line). Energy recovery (purple) is contrasting  
 755 between the two metabolisms: archaea employing proton motive force (membrane-bound  
 756 proteins gray) and bacteria substrate level phosphorylation. Reactions are not balanced with  
 757 H<sup>+</sup>, H<sub>2</sub>O, and P<sub>i</sub>. The pathways shown are based on “*Ca. Methanofastidiosum*”<sup>74</sup> and “*Ca.*  
 758 *Thermolithoacetigena glycinireducens*”. NiFe hyd, NiFe hydrogenase; Fd, ferredoxin; CoM-  
 759 SH, coenzyme M thiol; CoB-SH, coenzyme B thiol; CoM-S-S-CoB, heterodisulfide of  
 760 coenzyme M and coenzyme B; Mcr, methyl-coenzyme M reductase; CH<sub>3</sub>-X, methyl  
 761 compounds; MT, methyltransferase; CH<sub>3</sub>-S-CoM, methyl-coenzyme M; TR, thioredoxin  
 762 reductase; Trx-(SH)<sub>2</sub>, thioredoxin dithiol; Trx-S<sub>2</sub>, thioredoxin disulfide; Grd, glycine reductase;  
 763 acetyl-P<sub>i</sub>, acetyl-phosphate; Ack, acetate kinase.

764 **Methods**

765 *Sampling site and sample collection*

766 The Hakuba Happo samples for geochemical and microbiological analysis were artificially  
767 pumped from a drilling well (700 m in depth), which was previously described and named  
768 Happo #3 (36° 42' N 137° 48' E <sup>28</sup>). For microbiological analysis, two spring water samples  
769 were taken at different time points, 233 L taken in July 2016 (labelled HKB701) and 720 L  
770 taken in October 2016 (labelled HKB702), respectively. To collect cells, samples were filtered  
771 through a 0.1- $\mu$ m Omnipore™ membrane filter (Merck Millipore) using a 90 mm diameter  
772 stainless-steel filter holder (Merck Millipore) attached to FDA Viton® tubing (Masterflex) at a  
773 sampling site. After filtration, filters were immediately transferred to sterile tubes and frozen  
774 in a dry ice-ethanol bath, transported in dry ice, and stored at  $-80^{\circ}\text{C}$  until DNA extraction. For  
775  $\text{NH}_3$  and amino acid analysis, water samples were collected in October 2017, filtered as  
776 described above, transferred to dry-heat-sterilized nitrogen-purged 100-ml glass vials, and  
777 stored at  $4^{\circ}\text{C}$ .

778

779 *Geochemical analysis*

780 The water temperature of hot spring water was measured using a thermometer (CT-430WP,  
781 Custom Ltd.) at a site. The pH, oxidation reduction potential (ORP), electrical conductivity  
782 (EC), and dissolved oxygen (DO) level were determined with portable devices, including a pH  
783 meter (D-23, Horiba), an ORP meter (RM-30P, TOA-DKK), an EC meter (CM-31P, TOA-  
784 DKK), and a DO meter (DO-31P, TOA-DKK), correspondingly. The ion concentrations of  
785  $\text{Na}^+$ ,  $\text{K}^+$ ,  $\text{Ca}^{2+}$ , and  $\text{NO}_3^-$  were determined using portable sensors (LAQUAtwin™ series,  
786 Horiba). The *in situ*  $\text{NH}_3$  concentration was determined by measuring aqueous  $\text{NH}_4^+$  and  
787 gaseous  $\text{NH}_3$  (purged with  $\text{N}_2$  gas, gas dissolved into deionized water, and measured dissolved  
788  $\text{NH}_4^+$ ) of a sample stored as described above using high-performance liquid chromatography

789 (HPLC; Prominence; Shimadzu), then adding the two together. For amino acid quantification,  
790 the sample was concentrated under a stream of nitrogen gas and then analyzed following  
791 Shimadzu protocol no. L323 (<https://www.ssi.shimadzu.com/products/literature/lc/L323.pdf>)  
792 using HPLC with minor modifications (fluorescence detector RF-20AXs; sodium hypochlorite  
793 solution was not added for detection of proline). The Cedars spring concentrations of formate  
794 and acetate were determined by Isotope-Ratio-Monitoring Liquid Chromatography Mass  
795 Spectrometry (IRM-LCMS); Thermo- Finnigan Delta Plus XP isotope-ratio mass spectrometer  
796 connected to LC IsoLink, as described by Heuer et al. <sup>75</sup> and Ijiri et al. <sup>76</sup>.

797

### 798 *Thermodynamic calculations*

799 The Hakuba and Cedars calculations Gibbs free energy yield ( $\Delta G$ ) are based on  $\Delta G^\circ_f$  and  $\Delta H^\circ_f$   
800 values at 298 K, respective *pH* (10.8 and 11.9), and adjustment to the *in situ* temperatures (48  
801 and 17°C) through the Gibbs-Helmholtz equation <sup>77</sup>. The effect of pressure was approximated  
802 as described by Wang *et al* <sup>78</sup>. For both Hakuba and The Cedars calculations, the glycine  
803 concentration (5.4 nM) was based on measurements from Hakuba. Formate, acetate, and NH<sub>3</sub>  
804 concentrations were based on respective measurements from Hakuba (8  $\mu$ M formate, 4  $\mu$ M  
805 acetate, and 2.9  $\mu$ M NH<sub>3</sub>) and The Cedars (6.9  $\mu$ M formate [average of 6.777 and 7.079  $\mu$ M  
806 measured on September 2017], 69.3  $\mu$ M acetate [average of 69.601 and 68.967  $\mu$ M measured  
807 on September 2017], and 1  $\mu$ M NH<sub>3</sub> [below detection limit]). For Hakuba, the H<sub>2</sub> concentration  
808 measured in Hakuba drilling well #3 (DNA source) was used (201  $\mu$ M H<sub>2</sub>). For The Cedars,  
809 the highest detected H<sub>2</sub> concentration in Hakuba was used (664  $\mu$ M H<sub>2</sub> in drilling well #1).

810

### 811 *Metagenome sequencing, assembly and binning*

812 The filter was aseptically cut into 16 equal pieces using sterilized tweezers, and each piece was  
813 placed in the bead-beating tube (Lysing Matrix E tube; MP Biomedicals). After DNA

814 extraction following the bead-beating method described previously <sup>79</sup>, the 16 DNA samples  
815 were mixed and then stored at  $-80^{\circ}\text{C}$  until used. Sequence libraries were prepared with Nextera  
816 XT DNA Library Preparation kit (Illumina) with a genomic DNA fragment size ranging from  
817 200 to 2,000 bp. These libraries sequenced on HiSeq2500 sequencing platform (Illumina) with  
818 HiSeq Rapid SBS kit v2 (Illumina), generating paired-end reads up to 250 bp. The generated  
819 sequences were trimmed using Trimmomatic v0.33 <sup>80</sup> with a quality cutoff of 30, sliding  
820 window of 6 bp, and minimum length cutoff of 78 bp. The trimmed sequences were assembled  
821 using SPAdes v3.10.1 <sup>81</sup> with the “-meta” option and k-mer values of 21, 31, 41, 53, 65, and  
822 77. The assembled contigs were binned using MaxBin2.2.1 <sup>82,83</sup>. The completeness and  
823 contamination of each bin was checked using CheckM <sup>84</sup>. These bins were manually curated  
824 as described in our metagenomics study <sup>40</sup>. Genes were then annotated using Prokka v1.12 <sup>85</sup>  
825 and eggno-mapper <sup>86</sup>. For interpretation and comparison of microbial metabolism, bin  
826 genomes were also constructed from public metagenomic data generated from The Cedars <sup>20</sup>  
827 (trimmed with sliding window of 6, quality cutoff of 20, and minimum length of 68 bp through  
828 Trimmomatic v0.33, normalized using BBMap 36.99 ([https://jgi.doe.gov/data-and-](https://jgi.doe.gov/data-and-tools/bbtools/)  
829 [tools/bbtools/](https://jgi.doe.gov/data-and-tools/bbtools/)) with target and minimum coverages of 40 and 2, assembled using SPAdes  
830 v3.10.1 with the “-meta” option and k-mer values of 21, 33, 45, 55, 67, and binned through  
831 MaxBin2.2.1) and were then analyzed collectively.

832

### 833 *Phylogenomic and phylogenetic analysis*

834 For tree construction, sequences were aligned with MAFFT <sup>87</sup> v7.453 (default parameters) and  
835 trimmed using trimAl <sup>88</sup> v1.2rev59 (-gt 0.9). For ribosomal protein trees, a concatenated  
836 alignment of universally conserved ribosomal proteins <sup>89</sup> was used. Protein sequences were  
837 retrieved by downloading the GTDB <sup>90</sup> database and predicting protein sequences using Prokka  
838 <sup>85</sup> 1.14 (--kingdom Bacteria/Archaea --rnammer --addgenes --mincontiglen 200). Maximum

839 likelihood trees were calculated using PhyML<sup>91</sup> v3.3.20190909 using the LG<sup>92</sup> model and 100  
840 bootstrap replicates (-b 100 -d aa -m LG -v e). Bootstrap values were recalculated using  
841 BOOSTER<sup>93</sup>. Sequence clustering was performing through CD-HIT<sup>94</sup> v4.8.1. For glycine  
842 reductase GrdB and sarcosine reductase GrdF, conserved motifs were predicted by first  
843 identifying fully conserved residues in the sequence cluster including the biochemically  
844 characterized *Peptoclostridium acidaminophilum* GrdF (see Supplementary Fig. S4;  
845 YxNx(6)GGE x(34,38) CGD x(27,35) GPxF[NF]AGRYG x(150,181)  
846 IHGGYDRx(6)[IP]x(4)PxD x(19,20) TTGTGTx(7)F x(12) [HILV]), then identifying fully  
847 conserved residues in the phylogenetic clusters (see Supplementary Fig. S4) that include GrdB  
848 from phyla known to perform the Stickland reaction (*Firmicutes*, *Spirochaetes*, and  
849 *Synergistetes*) subtracting any sequences clusters that contain the GrdF motif above  
850 (YxNx(6)GGE x(34,38) CGD x(27,35) GPxF[NF]AGRYG x(157,178) AHGGxD[QTAP] x(8)  
851 RV[IL]PxD x(19,20) TxGNxTxV). Bayesian trees were calculated using Phylobayes (MPI)  
852 v1.8 using the LG model with 4 gamma categories (-lg -ncat 1 -dgam 4) with four chains (chain  
853 length 10000; -x 1 10000) of which three chains that converged (maxdiff=0.1859,  
854 meandiff=0.014) were used for determination of a consensus tree with a burn-in of 1000 (nodes  
855 with posterior probability less than 0.8 were collapsed; bpcomp -c 0.8 -x 1000 1).

856

#### 857 *Data availability*

858 The datasets generated during and/or analyzed during the current study are available in the  
859 National Center for Biotechnology Information (NCBI) under BioProject PRJNA453100 and  
860 BioSamples SAMN08978938-SAMN08978962.
